# Supplementary material
Source: PubMed Central journal article supplement (PMC3683315)
Supplement: NIHMS466831-supplement-01.pdf [file NIHMS466831-supplement-01.pdf]

## Supplementary Information

for

### Probing the stabilizing effects of modified nucleotides in the bacterial decoding region of 16S ribosomal RNA

Santosh K. Mahto and Christine S. Chow\*

*Department of Chemistry, Wayne State University, Detroit, MI 48202*

- p. 2 **Figure S1.**  $^1\text{H}$  NMR spectrum of the  $\text{m}^4\text{Cm}$  phosphoramidite (2)
- p. 3 **Figure S2.**  $^{31}\text{P}$  NMR spectrum of the  $\text{m}^4\text{Cm}$  phosphoramidite (2)
- p. 4 **Figure S3.**  $^{13}\text{C}$  NMR spectrum of the  $\text{m}^4\text{Cm}$  phosphoramidite (2)
- p. 5 **Figure S4.** Exact mass spectrum of the  $\text{m}^4\text{Cm}$  phosphoramidite (2)
- p. 6 **Figure S5.** MALDI-TOF spectra of the bacterial decoding region analogues
- p. 7 **Figure S6.** LCMS spectra of the digested bacterial decoding region analogue
- p. 8 **Figure S7.** Representative normalized UV melting curves
- p. 9 **Figure S8.** Reciprocal melting temperature vs. concentration plots
- p. 10 **Table S1.** Sequences and modification patterns of decoding region analogues

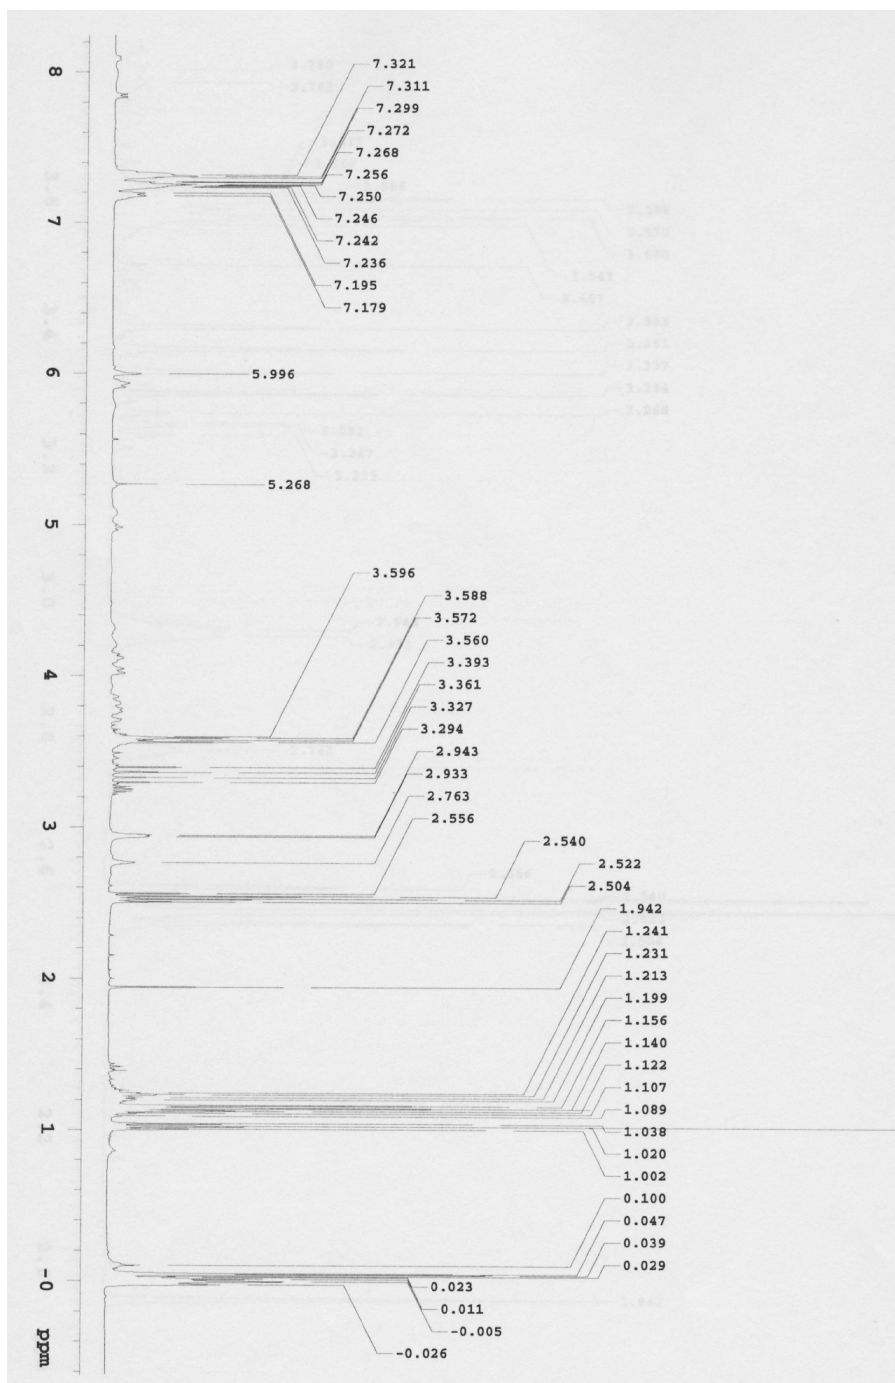

Figure S1. <sup>1</sup>H NMR spectrum of the m<sup>4</sup>Cm phosphoramidite (2) is shown.

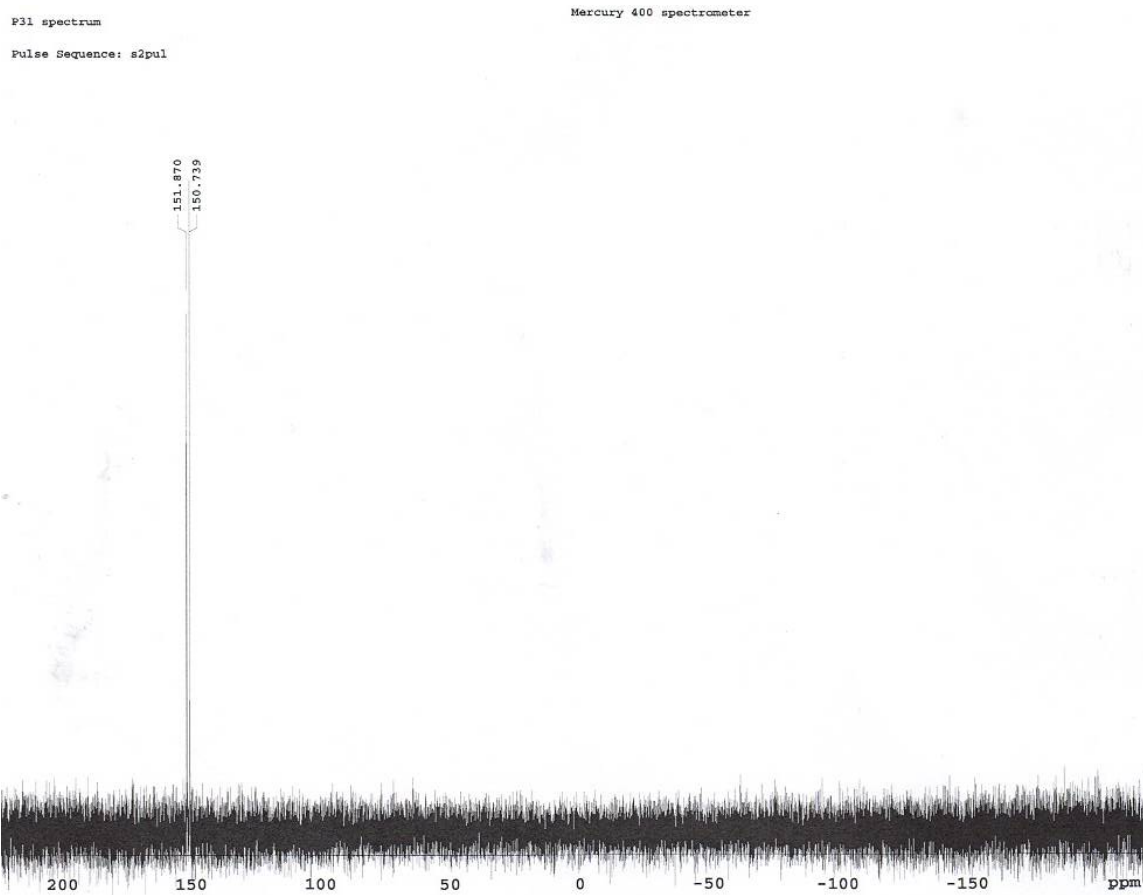

**Figure S2.**  $^{31}\text{P}$  NMR spectrum of the  $m^4\text{Cm}$  phosphoramidite (**2**) is shown.

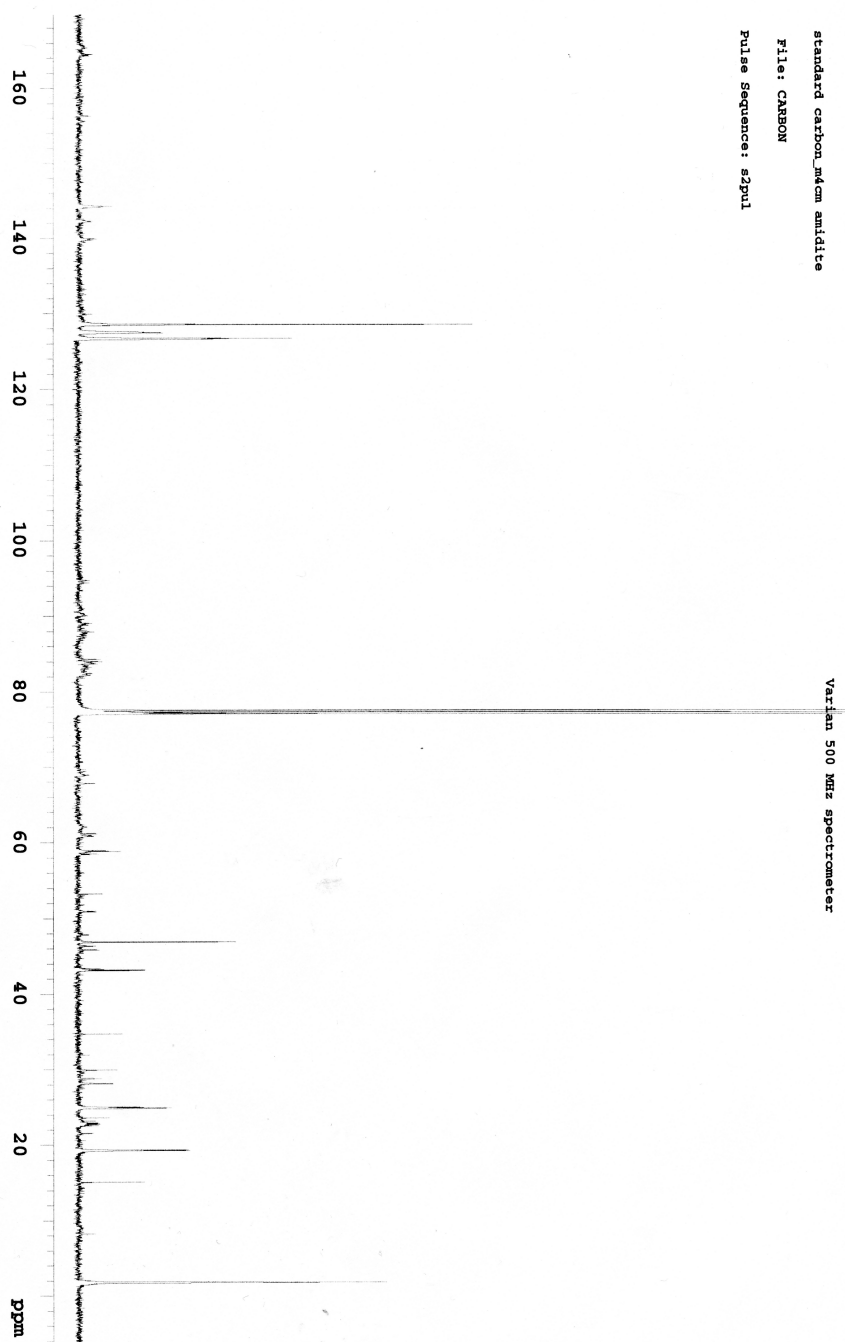

**Figure S3.** <sup>13</sup>C NMR spectrum of the m<sup>4</sup>Cm phosphoramidite (**2**) is shown

Elemental Composition Report

Single Mass Analysis

Tolerance = 5.0 PPM / DBE: min = -1.5, max = 50.0

Element prediction: Off

Number of isotope peaks used for i-FIT = 3

Monoisotopic Mass, Odd and Even Electron Ions

18667 formula(e) evaluated with 261 results within limits (up to 50 best isotopic matches for each mass)

Elements Used:

C: 0-50 H: 0-75 N: 0-10 O: 0-20 <sup>23</sup>Na: 0-1 Si: 0-3 P: 0-1

2009\_0806\_0527 13 (0.284) Cm (11:16-(1:6+39:46))

LCT Premier 06-Aug-2009 14:48:57

1: TOF MS ES+

SANTOSH MAHTO

SKM-I-m4Cm Phosphoramidite

1.82e+003

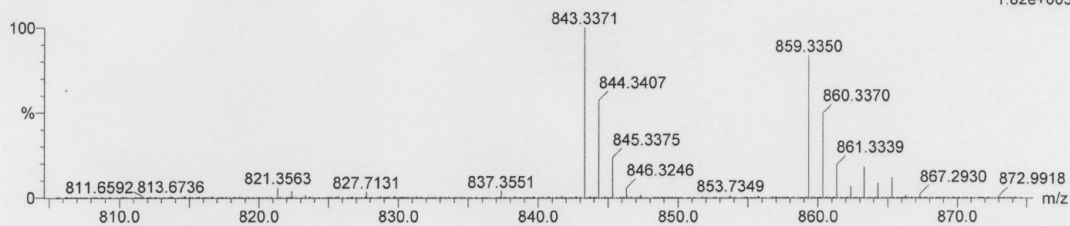

Minimum:

Maximum: 5.0 5.0 -1.5

50.0

| Mass     | Calc. Mass | mDa  | PPM  | DBE  | i-FIT | i-FIT (Norm) | Formula                                  |
|----------|------------|------|------|------|-------|--------------|------------------------------------------|
| 843.3371 | 843.3384   | -1.3 | -1.5 | 4.5  | 102.9 | 5.0          | C27 H60 N8 O15<br><sup>23</sup> Na Si3   |
|          | 843.3352   | 1.9  | 2.3  | 12.0 | 102.7 | 4.7          | C32 H58 N9 O10<br>Si3 P                  |
|          | 843.3355   | 1.6  | 1.9  | 13.5 | 102.3 | 4.4          | C33 H57 N10 O7<br><sup>23</sup> Na Si3 P |
|          | 843.3366   | 0.5  | 0.6  | 9.0  | 102.4 | 4.4          | C33 H58 N5 O15<br><sup>23</sup> Na Si2   |
|          | 843.3376   | -0.5 | -0.6 | 12.5 | 101.7 | 3.7          | C33 H55 N8 O14<br>Si2                    |
|          | 843.3379   | -0.8 | -0.9 | 14.0 | 101.0 | 3.1          | C34 H54 N9 O11<br><sup>23</sup> Na Si2   |
|          | 843.3355   | 1.6  | 1.9  | 8.0  | 102.8 | 4.8          | C34 H63 N3 O12<br><sup>23</sup> Na Si3 P |
|          | 843.3366   | 0.5  | 0.6  | 11.5 | 102.4 | 4.4          | C34 H60 N6 O11<br>Si3 P                  |
|          | 843.3376   | -0.5 | -0.6 | 7.0  | 102.4 | 4.4          | C34 H61 N O19<br>Si2                     |
|          | 843.3368   | 0.3  | 0.4  | 13.0 | 102.3 | 4.3          | C35 H59 N7 O8<br><sup>23</sup> Na Si3 P  |
|          | 843.3379   | -0.8 | -0.9 | 8.5  | 101.7 | 3.7          | C35 H60 N2 O16<br><sup>23</sup> Na Si2   |
|          | 843.3390   | -1.9 | -2.3 | 12.0 | 101.7 | 3.7          | C35 H57 N5 O15<br>Si2                    |
|          | 843.3379   | -0.8 | -0.9 | 16.5 | 102.6 | 4.6          | C35 H56 N10 O7<br>Si3 P                  |
|          | 843.3368   | 0.3  | 0.4  | 7.5  | 102.7 | 4.7          | C36 H65 O13 <sup>23</sup> Na<br>Si3 P    |
|          | 843.3379   | -0.8 | -0.9 | 11.0 | 102.9 | 4.9          | C36 H62 N3 O12<br>Si3 P                  |
|          | 843.3403   | -3.2 | -3.8 | 17.0 | 101.6 | 3.6          | C36 H53 N9 O11<br>Si2                    |
|          | 843.3392   | -2.1 | -2.5 | 13.5 | 101.2 | 3.2          | C36 H56 N6 O12<br><sup>23</sup> Na Si2   |
|          | 843.3382   | -1.1 | -1.3 | 12.5 | 103.0 | 5.0          | C37 H61 N4 O9<br><sup>23</sup> Na Si3 P  |
|          | 843.3406   | -3.5 | -4.2 | 18.5 | 101.5 | 3.5          | C37 H52 N10 O8<br><sup>23</sup> Na Si2   |
|          | 843.3403   | -3.2 | -3.8 | 11.5 | 102.3 | 4.3          | C37 H59 N2 O16<br>Si2                    |
|          | 843.3406   | -3.5 | -4.2 | 13.0 | 102.0 | 4.0          | C38 H58 N3 O13<br><sup>23</sup> Na Si2   |

Figure S4. Exact mass spectrum of the m<sup>4</sup>Cm phosphoramidite (2) is shown.

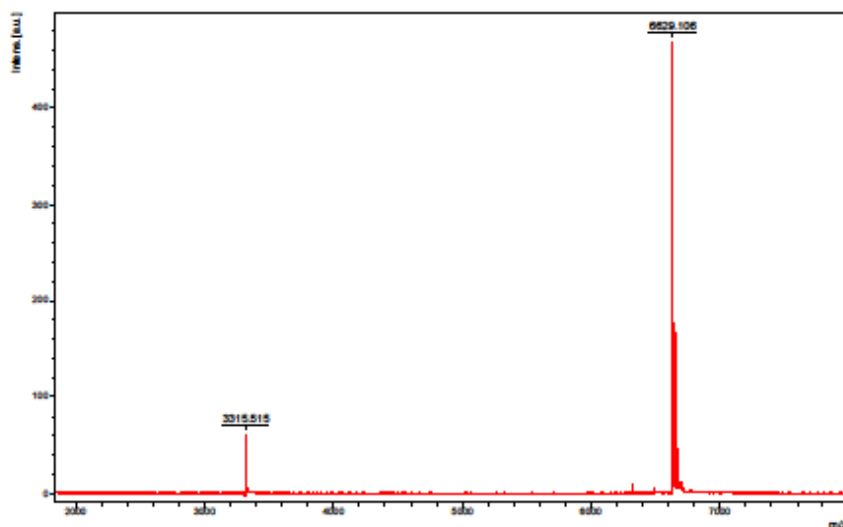

5' half decoding region unmodified (sequence 5'-GCA CAG ACC GCC CGU CAC ACC-3') calculated mass = 6628.0, observed mass = 6629.1 (M+H<sup>+</sup>).

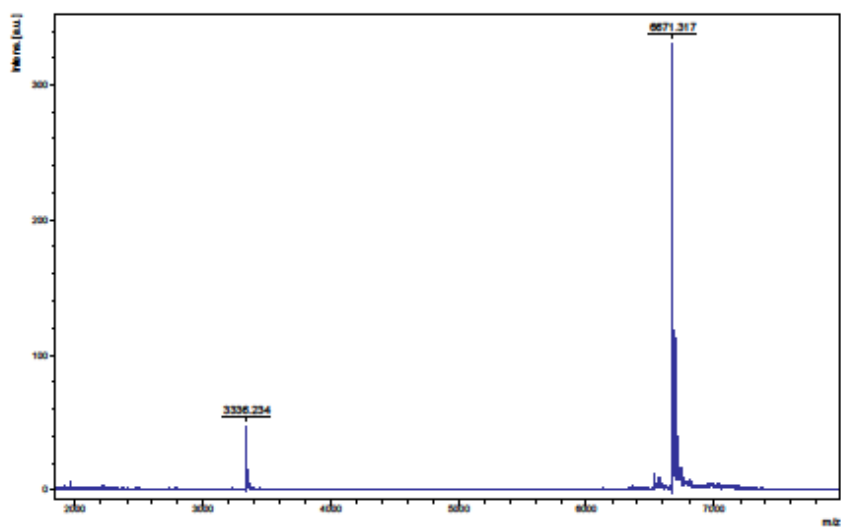

5' half decoding region modified (sequence 5'-GCA CAG ACC G (m<sup>4</sup>Cm) C CGU (m<sup>5</sup>C) AC ACC-3') calculated mass = 6670.1, observed mass = 6671.3 (M+H<sup>+</sup>).

**Figure S5.** MALDI-TOF spectra of the bacterial decoding region analogues are shown.

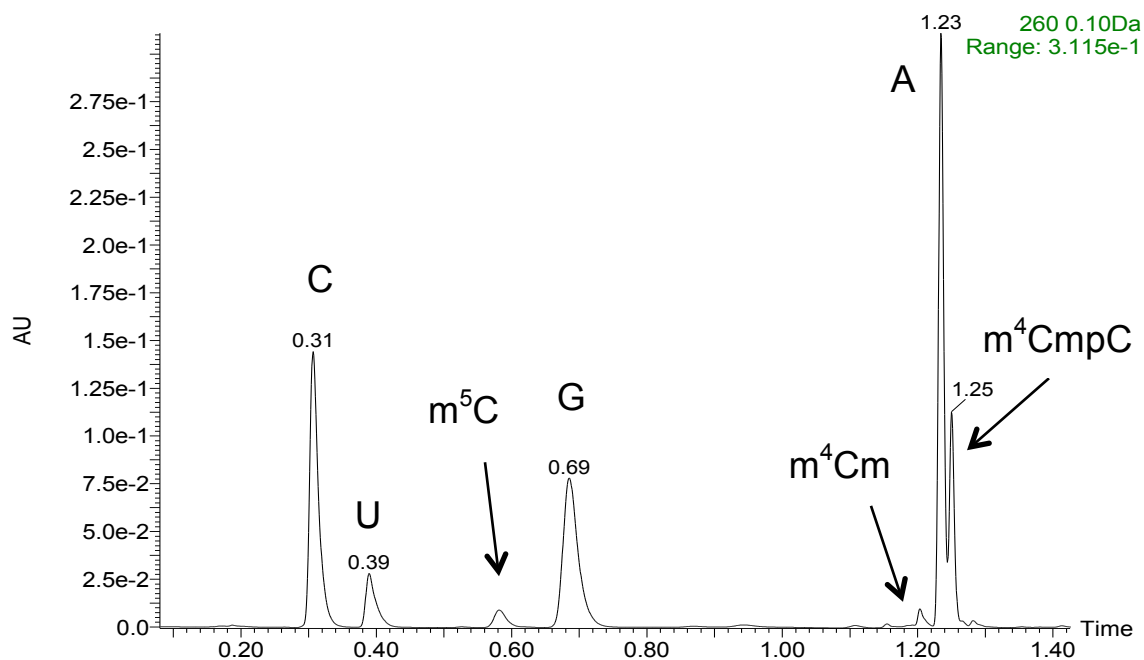

Sequence: 5'-GCA CAG ACC G (m<sup>4</sup>Cm) C CGU (m<sup>5</sup>C) AC ACC-3'

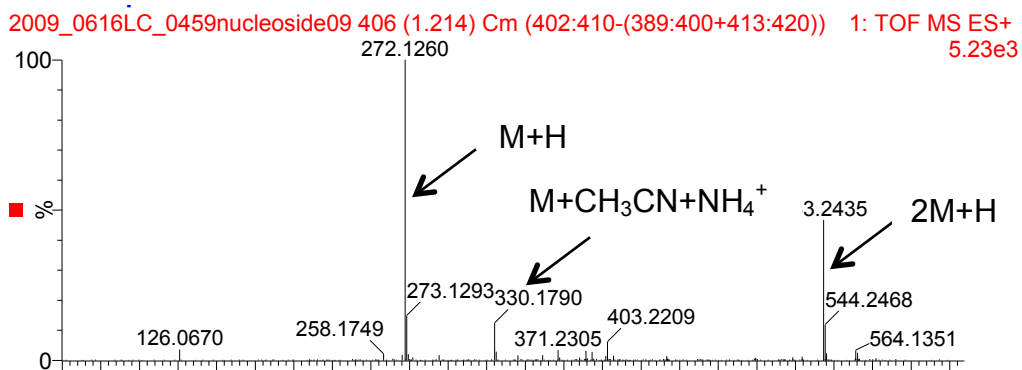

**Figure S6.** LCMS spectra of the digested bacterial decoding region analogue are shown. In the upper panel, the run of liquid chromatogram of the 5' modified decoding region digested sample is shown. In the lower panel, mass spectra data of the peak for modified nucleoside m<sup>4</sup>Cm are given.

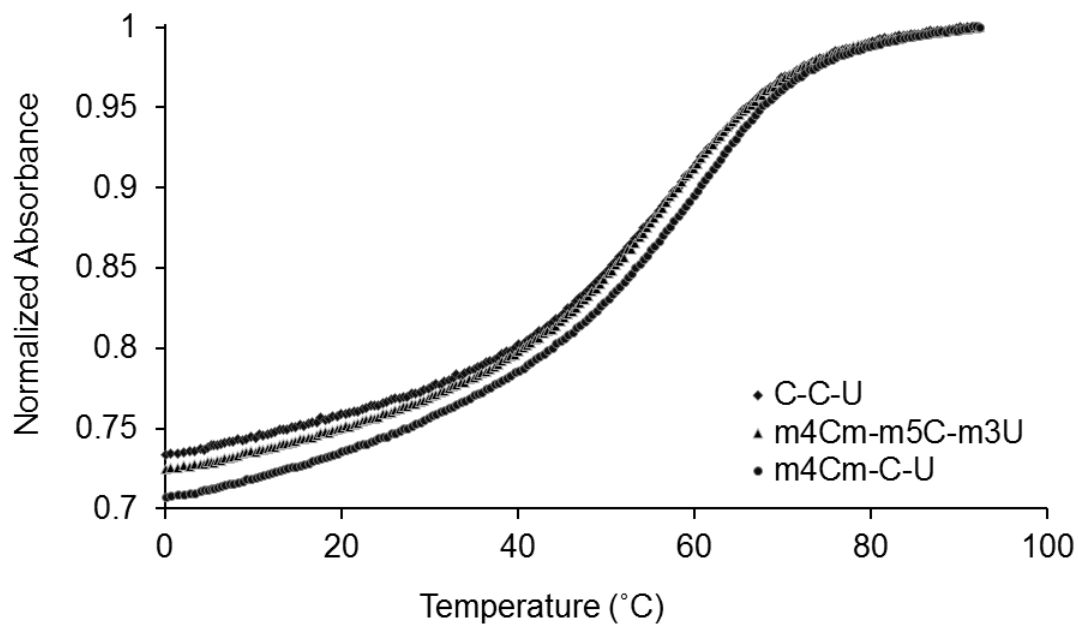

**Figure S7.** Representative normalized UV melting curves for unmodified decoding region (C-C-U), modified decoding region (m<sup>4</sup>Cm-m<sup>5</sup>C-m<sup>3</sup>U), and singly modified decoding region (m<sup>4</sup>Cm-C-U) are shown. All melting curves were normalized at 95 °C. Buffer: 20 mM sodium cacodylate, 1 M NaCl, 0.5 mM Na<sub>2</sub>EDTA, pH 7.0.



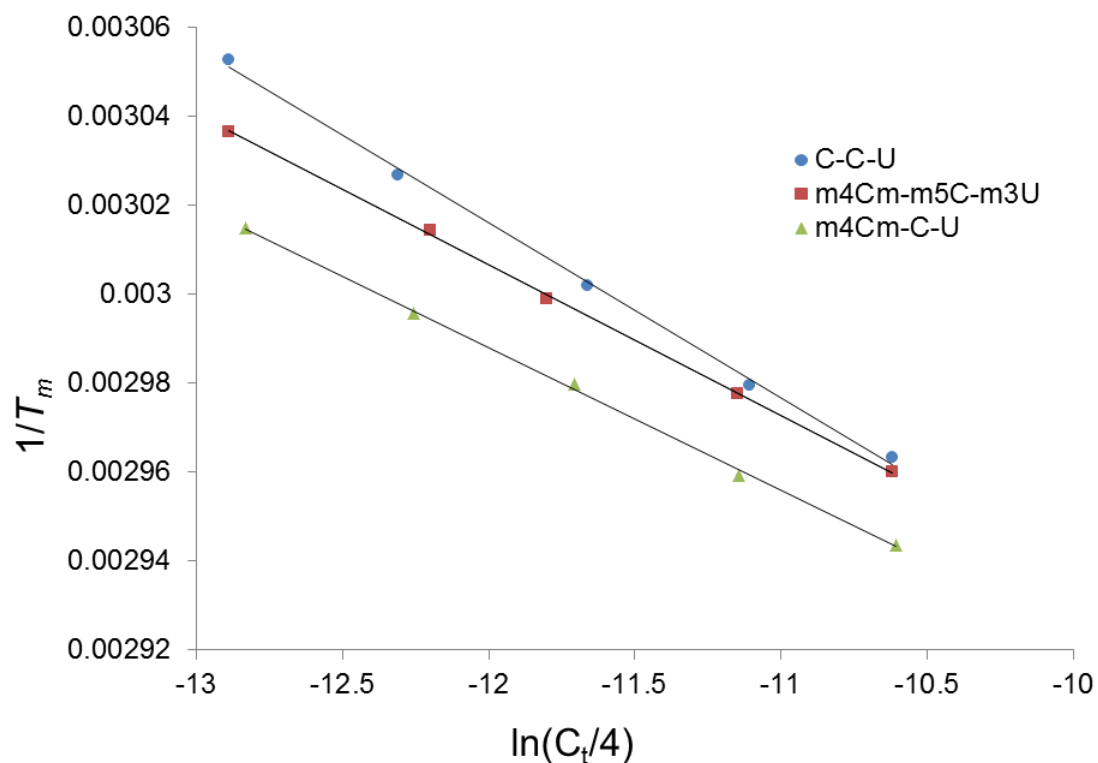

**Figure S8.** Representative reciprocal melting temperature ( $T_m$ ) vs.  $\ln$  (Total strand concentration/4) plots for unmodified decoding region (C-C-U), modified decoding region (m<sup>4</sup>Cm-m<sup>5</sup>C-m<sup>3</sup>U), and singly modified decoding region (m<sup>4</sup>Cm-C-U) are shown. Buffer: 20 mM sodium cacodylate, 1 M NaCl, 0.5 mM Na<sub>2</sub>EDTA, pH 7.0.

| Analogues                                           | $\Delta G^\circ_{37}$ (kcal/mol) | $\Delta H^\circ$ (kcal/mol) | $\Delta S^\circ$ (cal/K•mol) |
|-----------------------------------------------------|----------------------------------|-----------------------------|------------------------------|
| C-C-U                                               | -10.9                            | -49                         | -122                         |
| m <sup>4</sup> Cm-C-U                               | -12.0                            | -62                         | -161                         |
| m <sup>4</sup> Cm-m <sup>5</sup> C-m <sup>3</sup> U | -11.4                            | -59                         | -153                         |

**Table S1.** Sequences and modification patterns of decoding region analogues.

| Name and sequence                                                                                                                                                                                                                        | Calculated mass | Observed mass (M+H) <sup>+</sup> |
|------------------------------------------------------------------------------------------------------------------------------------------------------------------------------------------------------------------------------------------|-----------------|----------------------------------|
| 5' half of the unmodified decoding region ( <b>C-C</b> ):<br>5'-GCA CAG ACC GCC CGU CAC ACC-3'                                                                                                                                           | 6628.0          | 6629.1                           |
| 5' half of <i>E. coli</i> decoding region ( <b>m<sup>4</sup>Cm-m<sup>5</sup>C</b> ):<br>5'-GCA CAG ACC G (m <sup>4</sup> Cm) C CGU (m <sup>5</sup> C) AC ACC-3'                                                                          | 6670.1          | 6671.3                           |
| 5' half of <i>C. acetobutylicum</i> decoding region ( <b>m<sup>4</sup>Cm-m<sup>5</sup>C</b> ):<br>5'-GCA CAG ACC G (m <sup>4</sup> Cm) C CGU CA(m <sup>5</sup> C) ACC-3'                                                                 | 6670.1          | 6671.2                           |
| 5' half of <i>T. Thermophilus</i> decoding region ( <b>m<sup>5</sup>C-m<sup>4</sup>Cm- m<sup>5</sup>C-m<sup>5</sup>C</b> ):<br>5'-GCA CAG A(m <sup>5</sup> C)C G (m <sup>4</sup> Cm) C (m <sup>5</sup> C)GU (m <sup>5</sup> C) AC ACC-3' | 6698.2          | 6699.5                           |
| 5' half of the decoding region ( <b>m<sup>4</sup>Cm-C</b> ):<br>5'-GCA CAG ACC G (m <sup>4</sup> Cm) C CGU CAC ACC-3'                                                                                                                    | 6656.1          | 6657.2                           |
| 5' half of the decoding region ( <b>C-m<sup>5</sup>C</b> ):<br>5'-GCA CAG ACC GCC CGU m <sup>5</sup> C AC ACC-3'                                                                                                                         | 6642.0          | 6643.1                           |
| 5' half of the decoding region ( <b>m<sup>4</sup>C-C</b> ):<br>5'-GCA CAG ACC G (m <sup>4</sup> C) C CGU CAC ACC-3'                                                                                                                      | 6642.0          | 6643.1                           |
| 5' half of the decoding region ( <b>Cm-C</b> ):<br>5'-GCA CAG ACC G (Cm) C CGU CAC ACC-3'                                                                                                                                                | 6642.0          | 6643.0                           |
| 3' half of the bacterial unmodified decoding region ( <b>U</b> ):<br>5'-GGU GAA GUC GUA ACA AGG CUG UGC-3'                                                                                                                               | 7771.7          | 7772.9                           |
| 3' half of the bacterial modified decoding region ( <b>m<sup>3</sup>U</b> ):<br>5'-GGU GAA GUC G (m <sup>3</sup> U) A ACA AGG CUG UGC-3'                                                                                                 | 7785.7          | 7787.0                           |
